# Supplementary material for: ORAOV1, CCND1, and MIR548K Are the Driver Oncogenes of the 11q13 Amplicon in Squamous Cell Carcinoma
Source: PubMed Central journal article supplement — Mol Cancer Res. 2023 Nov 6;22(2):152–68. doi: 10.1158/1541-7786.MCR-23-0746 (PMC10831340; doi:10.1158/1541-7786.mcr-23-0746), 2023-11-06
Supplement: mcr-23-0746_supplementary_figure_2_suppsf2.pdf [file mcr-23-0746_supplementary_figure_2_suppsf2.pdf]

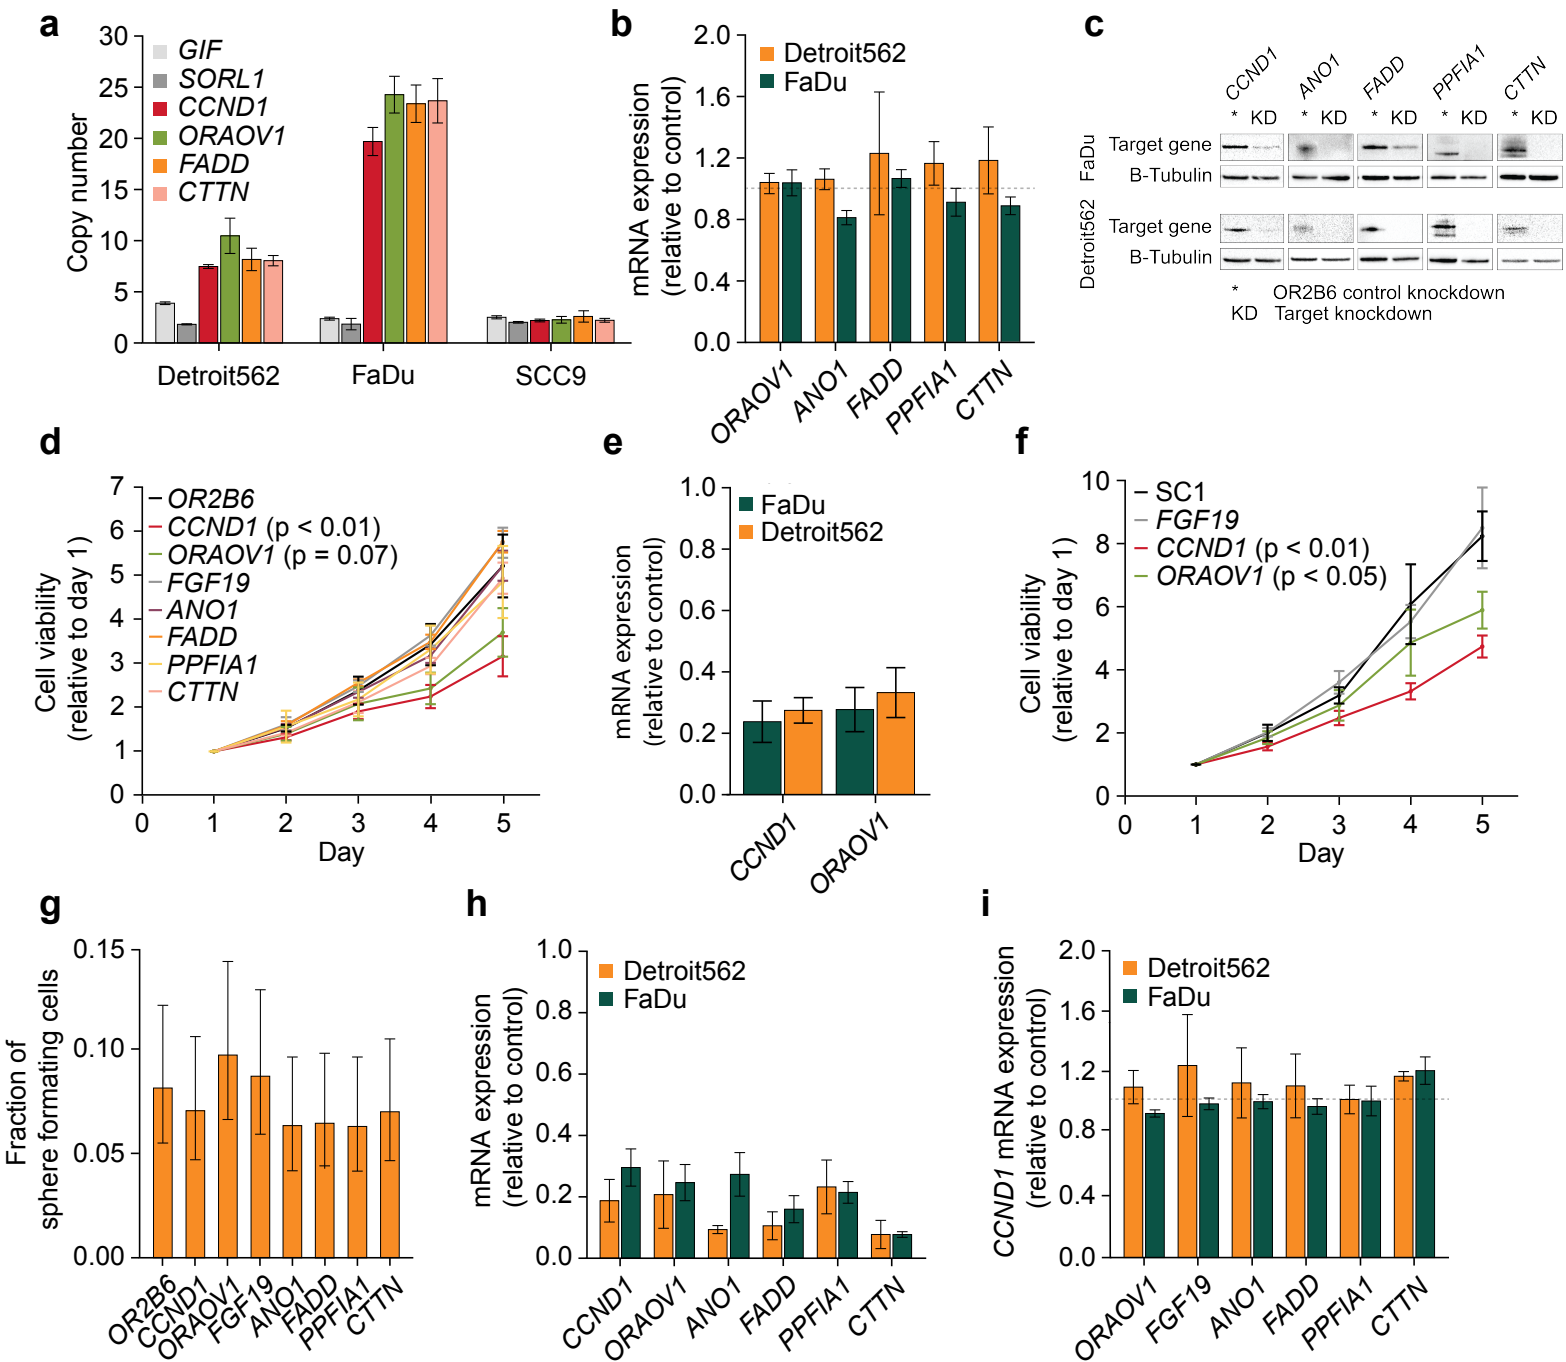

**Figure S2. Growth analyses upon efficient and gene specific knock down in 11q13 amplified cells**

- a.** RT-qPCR copy number values of *GIF* (11q12), *SORL1* (11q24), and 11q13 genes, calculated relative to primary OKC
- b.** Gene expression values 72 hrs post transduction with guideRNA, relative to OR2B6 knockdown control.
- c.** Immunoblot analysis of 11q13 genes in FaDu and Detroit562 cells upon CRISPRi-mediated knockdown of target genes.
- d.** Relative cell viability values based on Alamar Blue assay upon CRISPR-i mediated knockdown of 11q13 genes in Detroit562 cells. P values calculated with two-way ANOVA test. Average doubling times in hours; OR2B6: 40.3, CCND1: 57.8, ORAOV1: 50.8, FGF19: 38.1, ANO1: 40.3, FADD: 38.0, PPFIA1: 42.1, CTTN: 41.7.
- e.** Gene expression values 96 hrs post respective gene knockout, relative to SC1 control.
- f.** Relative cell viability values based on Alamar Blue assay upon CRISPR mediated knock-out of 11q13 genes in Detroit562 cells. Average doubling times in hours: SC1: 32.3, FGF19: 31.1, CCND1: 42.7, ORAOV1: 39.0.
- g.** Spheroid formation frequency upon CRISPR-i mediated knockdown of 11q13 genes in Detroit562 cells. Error bars represent 95% confidence interval, p values calculated with chi-square test (none significant).
- h.** Gene expression of 11q13 genes upon CRISPR-i mediated knockdown of *CCND1* in FaDu and Detroit562 cells.
- i.** *CCND1* gene expression upon CRISPR-i mediated knockdown of 11q13 genes in FaDu and Detroit562 cells.
