# Supplementary material for: ORAOV1, CCND1, and MIR548K Are the Driver Oncogenes of the 11q13 Amplicon in Squamous Cell Carcinoma
Source: PubMed Central journal article supplement — Mol Cancer Res. 2023 Nov 6;22(2):152–68. doi: 10.1158/1541-7786.MCR-23-0746 (PMC10831340; doi:10.1158/1541-7786.mcr-23-0746), 2023-11-06
Supplement: mcr-23-0746_supplementary_figure_3_suppsf3.pdf [file mcr-23-0746_supplementary_figure_3_suppsf3.pdf]

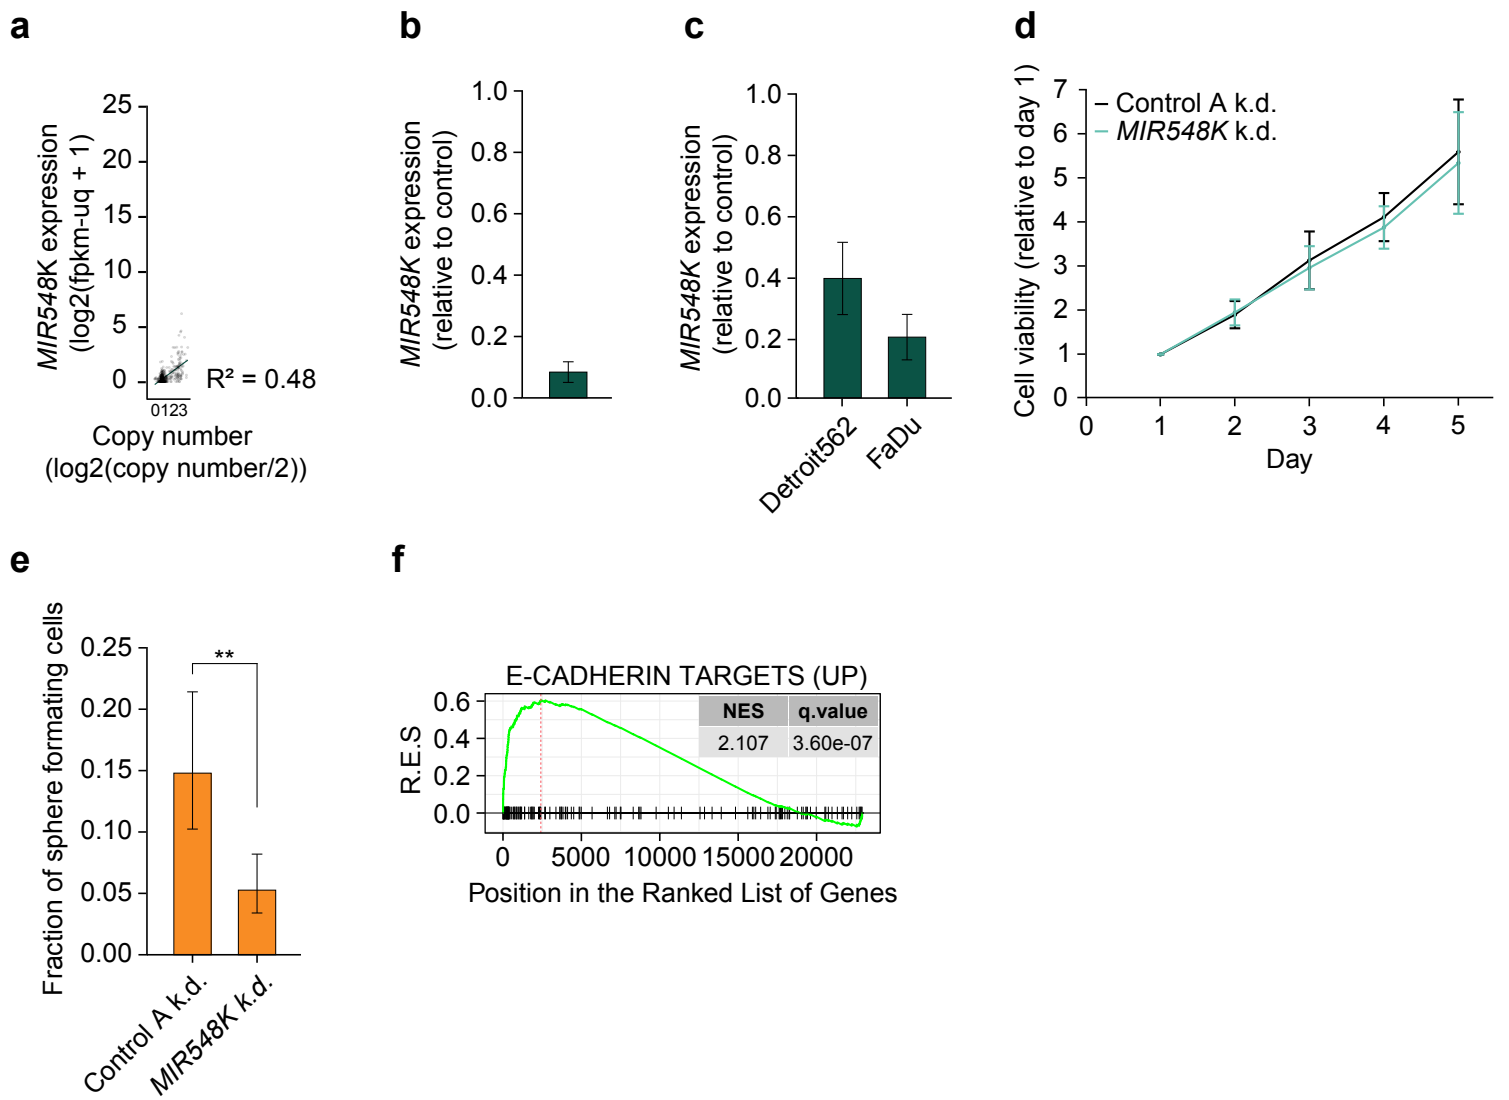

### Figure S3. Growth analyses upon abrogation of *MIR548K*

- a.** Correlation between *MIR548K* expression and copy number in HNSCC (TCGA, n = 457). R2 value represents Spearman coefficient, p value calculated with Holm correction (significant).
- b.** *MIR548K* expression values 96 hrs post CRISPR-RNP transfection, relative to control.
- c.** *MIR548K* expression values 72 hrs post LNA transfection, relative to control.
- d.** Relative cell viability values based on Alamar Blue assay upon LNA mediated knockdown of *MIR548K* in Detroit562 cells. Average doubling times in hours; A: 38.6, *MIR548K*: 39.7.
- e.** Spheroid formation frequency upon LNA mediated knockdown of *MIR548K* in Detroit562 cells. Error bars represent 95% confidence interval, p value calculated with chi-square test (\*\*p < 0.01).
- f.** Running Enrichment Scores of GSEA upon *MIR548K* knockout in FaDu cells for the ONDER\_CDH1\_TARGETS\_1\_UP Gene Set.
