# Supplementary material for: ORAOV1, CCND1, and MIR548K Are the Driver Oncogenes of the 11q13 Amplicon in Squamous Cell Carcinoma
Source: PubMed Central journal article supplement — Mol Cancer Res. 2023 Nov 6;22(2):152–68. doi: 10.1158/1541-7786.MCR-23-0746 (PMC10831340; doi:10.1158/1541-7786.mcr-23-0746), 2023-11-06
Supplement: mcr-23-0746_supplementary_figure_6_suppsf6.pdf [file mcr-23-0746_supplementary_figure_6_suppsf6.pdf]

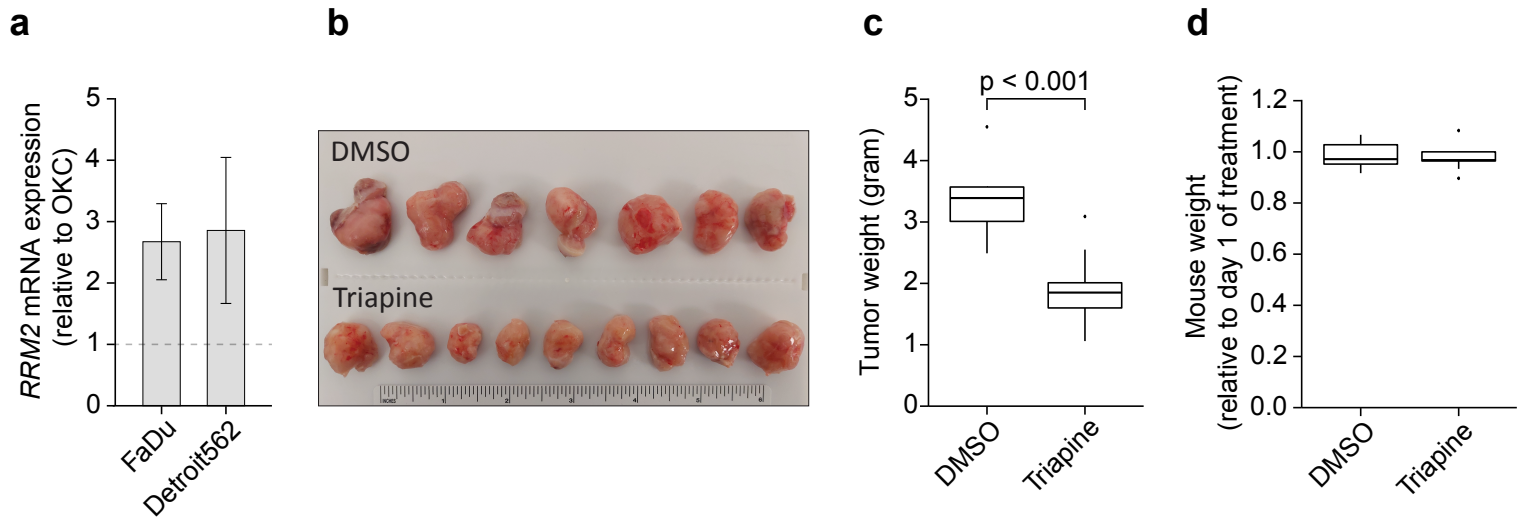

**Figure S6. Expression and inhibition of RRM2**

**a.** *RRM2* expression values in FaDu and Detroit562 cells, relative to primary OKC.

**b.** Tumors harvested on day 17 post 1st treatment of either DMSO or triapine treated mice.

**c.** Tumor weight in grams of either DMSO or triapine treated mice.

**d.** Mouse weight in grams relative to day 1 of treatment of either DMSO or triapine treated mice.
