# Supplementary material for: ORAOV1, CCND1, and MIR548K Are the Driver Oncogenes of the 11q13 Amplicon in Squamous Cell Carcinoma
Source: PubMed Central journal article supplement — Mol Cancer Res. 2023 Nov 6;22(2):152–68. doi: 10.1158/1541-7786.MCR-23-0746 (PMC10831340; doi:10.1158/1541-7786.mcr-23-0746), 2023-11-06
Supplement: mcr-23-0746_supplementary_figure_7_suppsf7.pdf [file mcr-23-0746_supplementary_figure_7_suppsf7.pdf]

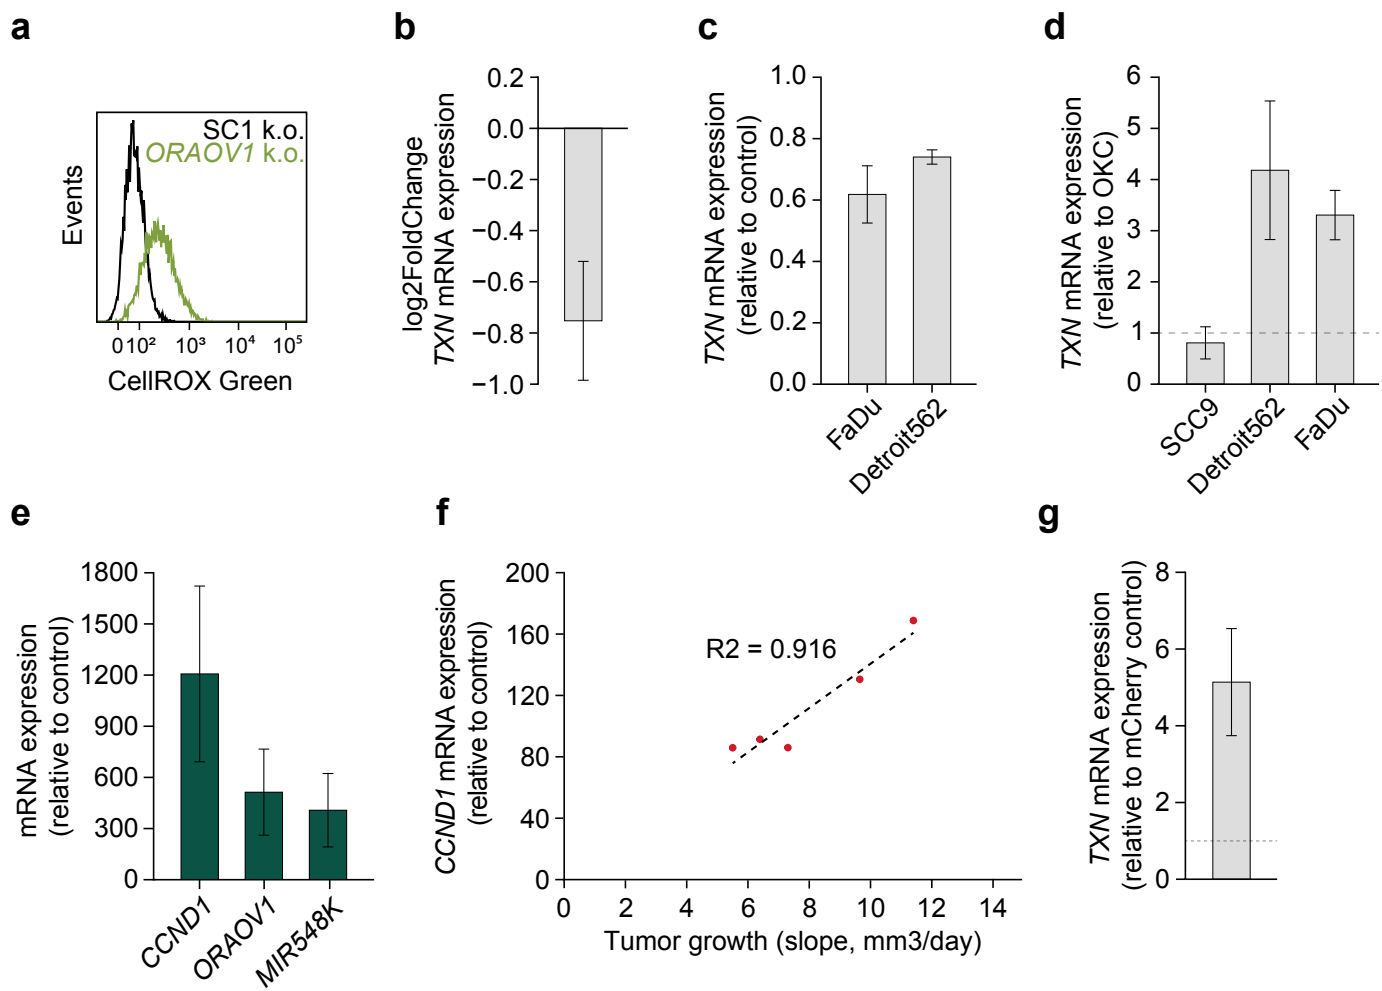

**Figure S7. Expression analysis of *TXN* and in vivo tumors**

- a.** Reactive Oxygen Species (ROS) levels as measured by CellIROX Green in Detroit562 cells upon *ORAOV1* knockout.
- b.** Log2FoldChange of *TXN* expression upon *ORAOV1* knockout in FaDu cells (RNAseq,  $q < 0.05$ ).
- c.** *TXN* expression values in FaDu and Detroit562 cells upon *ORAOV1* knockout.
- d.** *TXN* expression values in SCC9, Detroit562, and FaDu cells relative to OKC.
- e.** Gene expression values of dissected tumors, relative to control cells from pre-injection.
- f.** Correlation between *CCND1* expression levels and in vivo tumor growth (mm<sup>3</sup>/day).
- g.** *TXN* expression values of dissected mCherry and *ORAOV1*-induced tumors, relative to control cells from pre-injection.
